# Supplementary material for: You are more than what you eat: potentially adaptive enrichment of microbiome functions across bat dietary niches
Source: PubMed Central journal article supplement (PMC8672517; doi:10.1186/s42523-021-00139-8), 2021-12-14

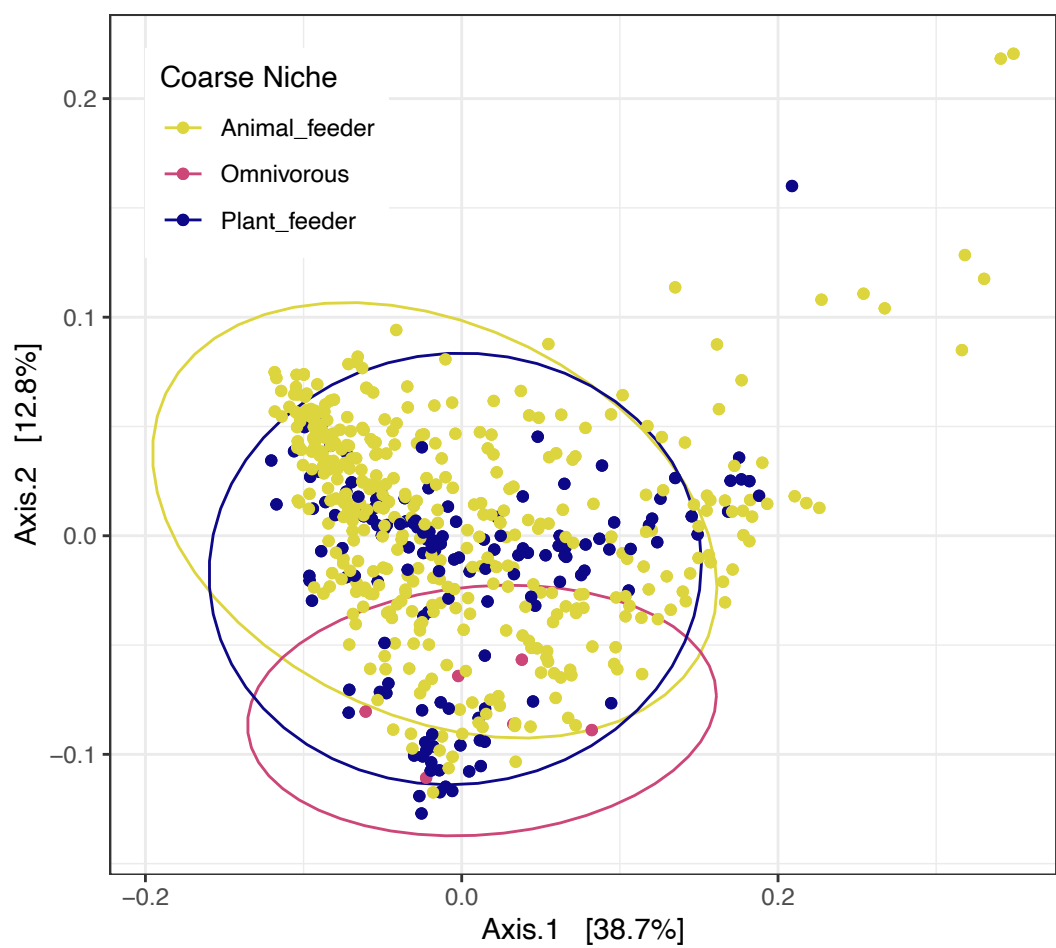

Supplement: 42523_2021_139_MOESM1_ESM.pdf [file 42523_2021_139_MOESM1_ESM.pdf]
